# Supplementary material
Source: PubMed Central journal article supplement (PMC6130364)
Supplement: pnas.1802316115.sapp.pdf [file pnas.1802316115.sapp.pdf]

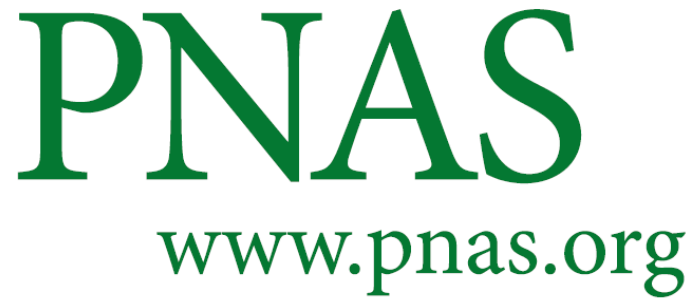

## Supplementary Information for

### **Decreasing fire season precipitation increased recent western US forest wildfire activity**

Zachary A. Holden, Alan Swanson, Charles H. Luce, W. Matt Jolly, Marco Maneta, Jared W. Oyler, Dyer A. Warren, Russell Parsons and David Affleck

Zachary A. Holden  
Email: [zaholden@fs.fed.us](mailto:zaholden@fs.fed.us)

#### **This PDF file includes:**

Figs. S1 to S10  
Table S1

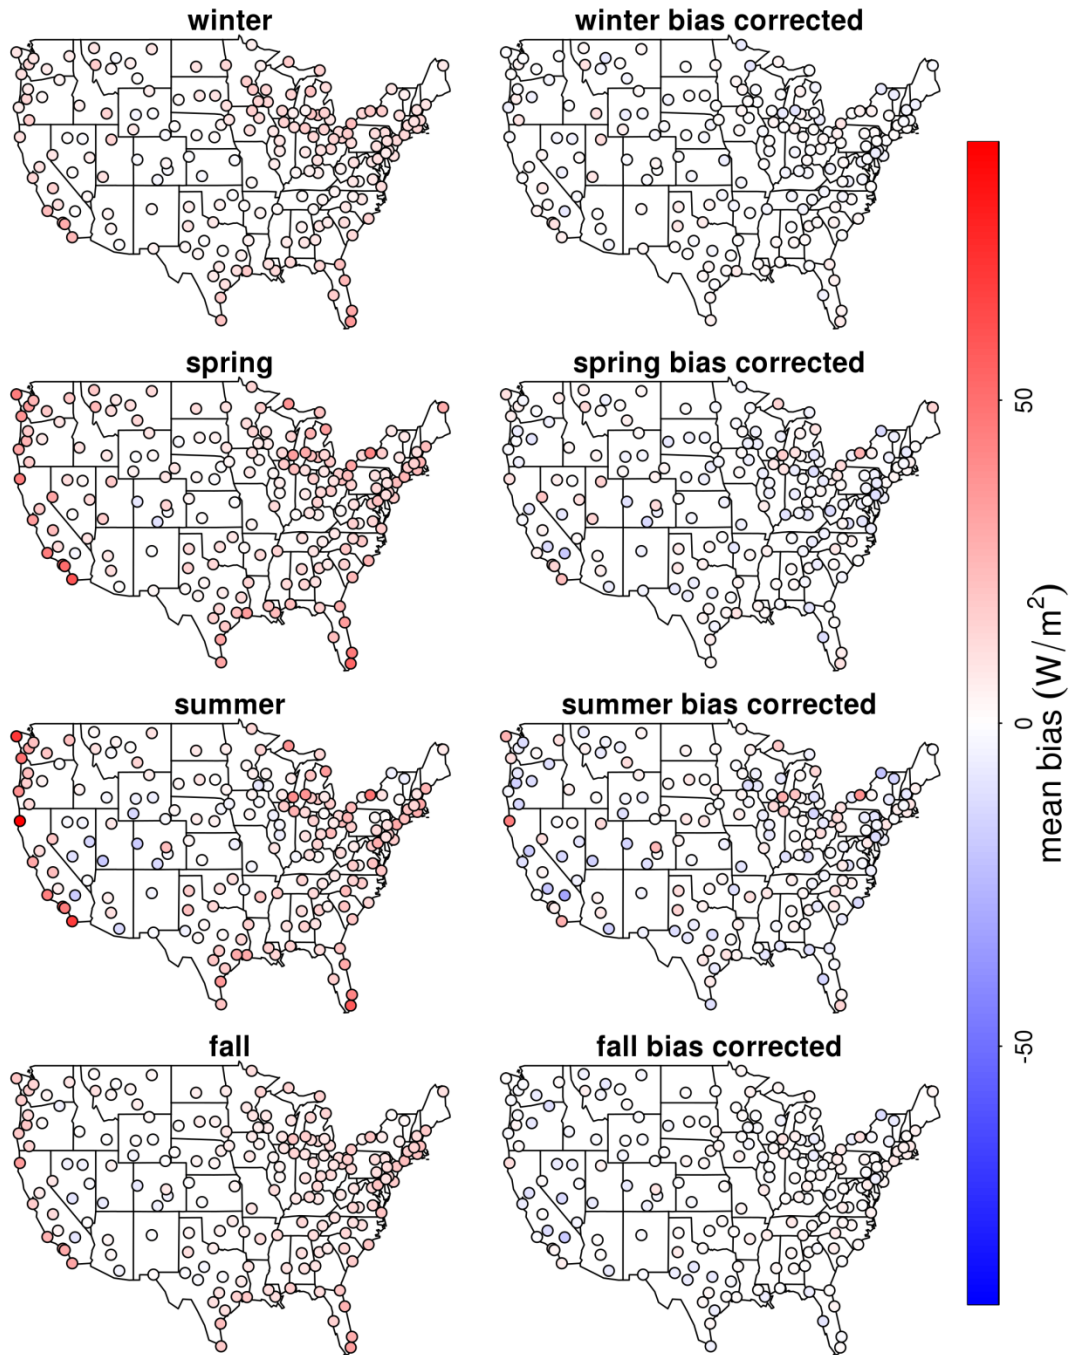

**Fig. S1.** Seasonal errors in NLDAS-2 shortwave radiation (1979-2010) compared with NSRDB shortwave radiation observations before and after bias correction.

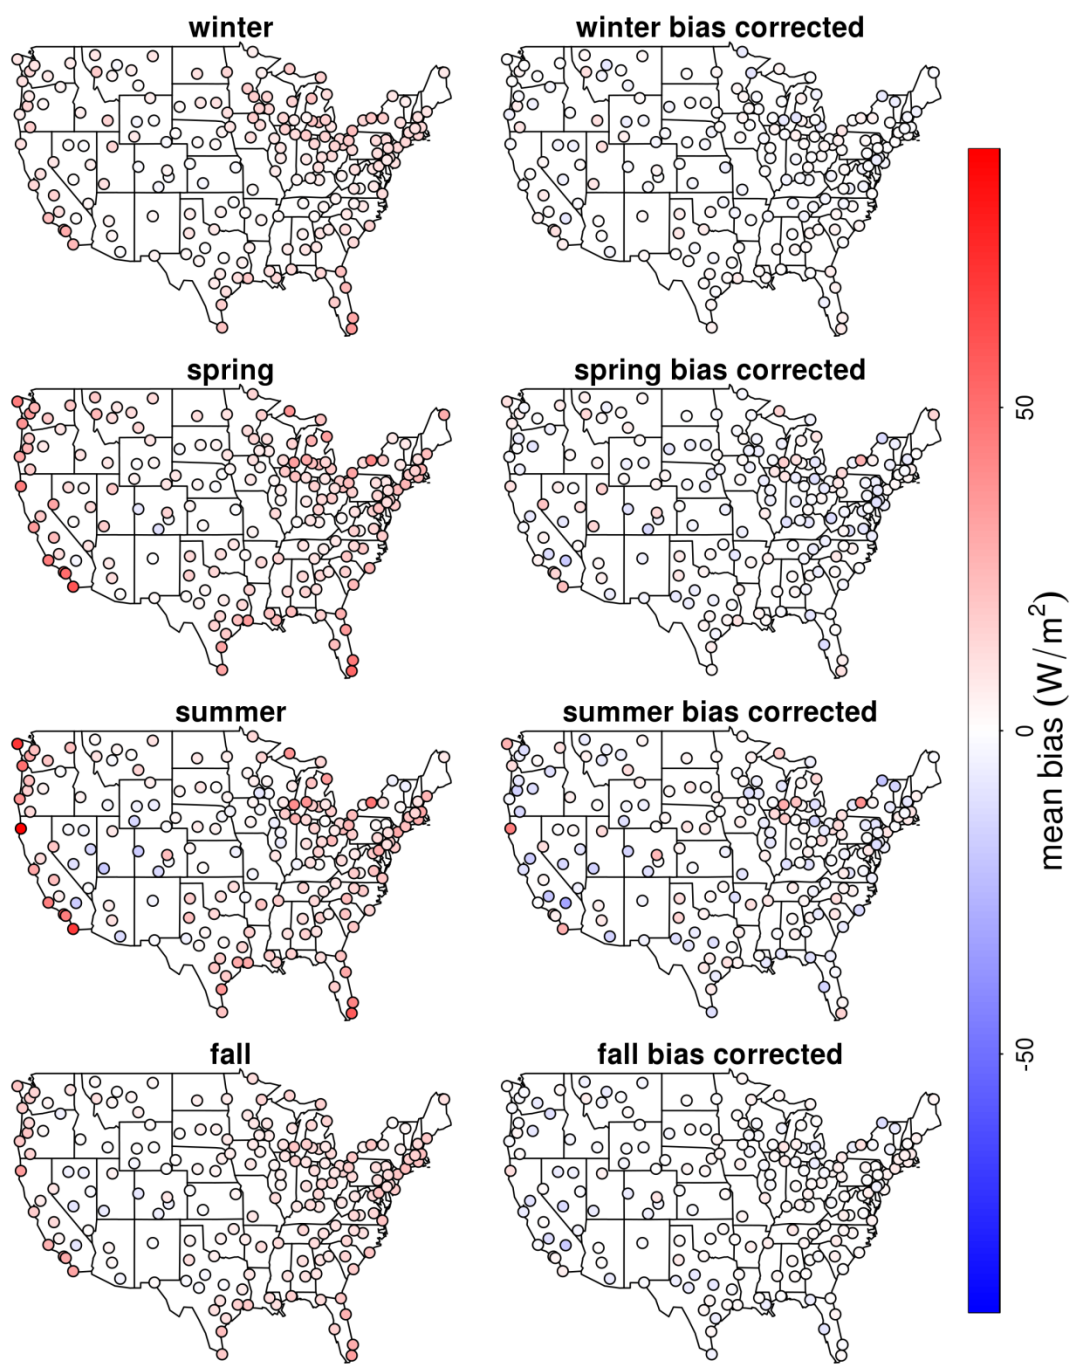

**Fig. S2.** Seasonal errors in NLDAS-2 shortwave radiation compared with Climate Reference Network stations from 2010-2015.

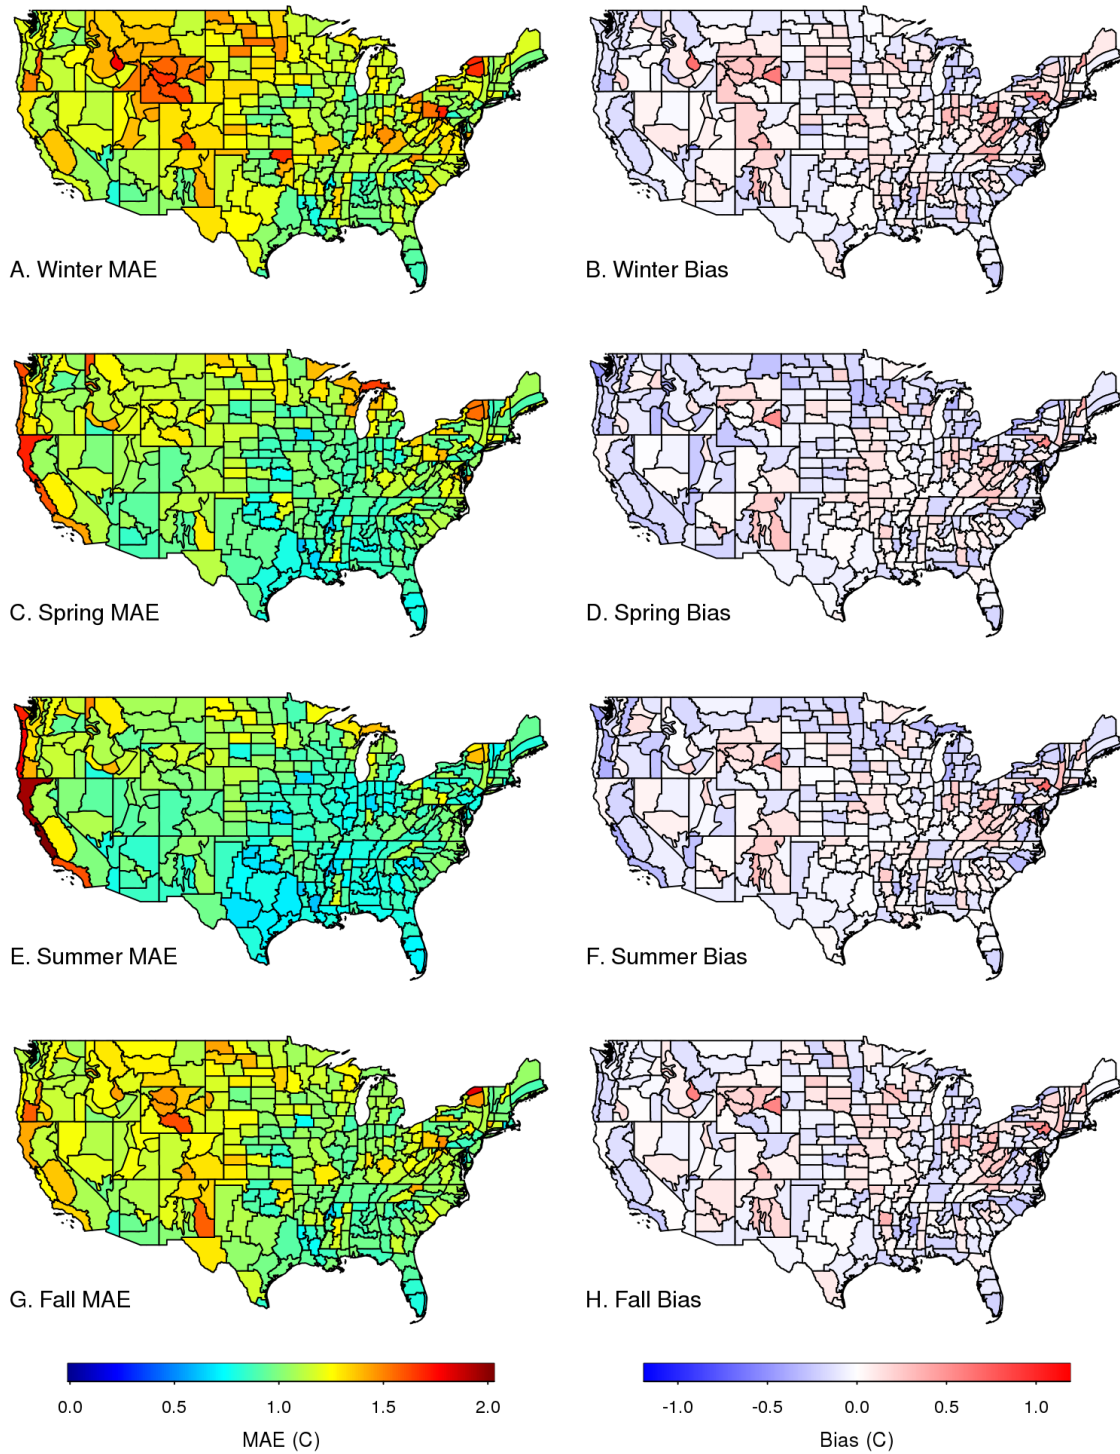

**Fig. S3.** Seasonal errors in daily maximum air temperature averaged by US climate division, with Mean Absolute Error (MAE) in the left panel and bias in the right panel.

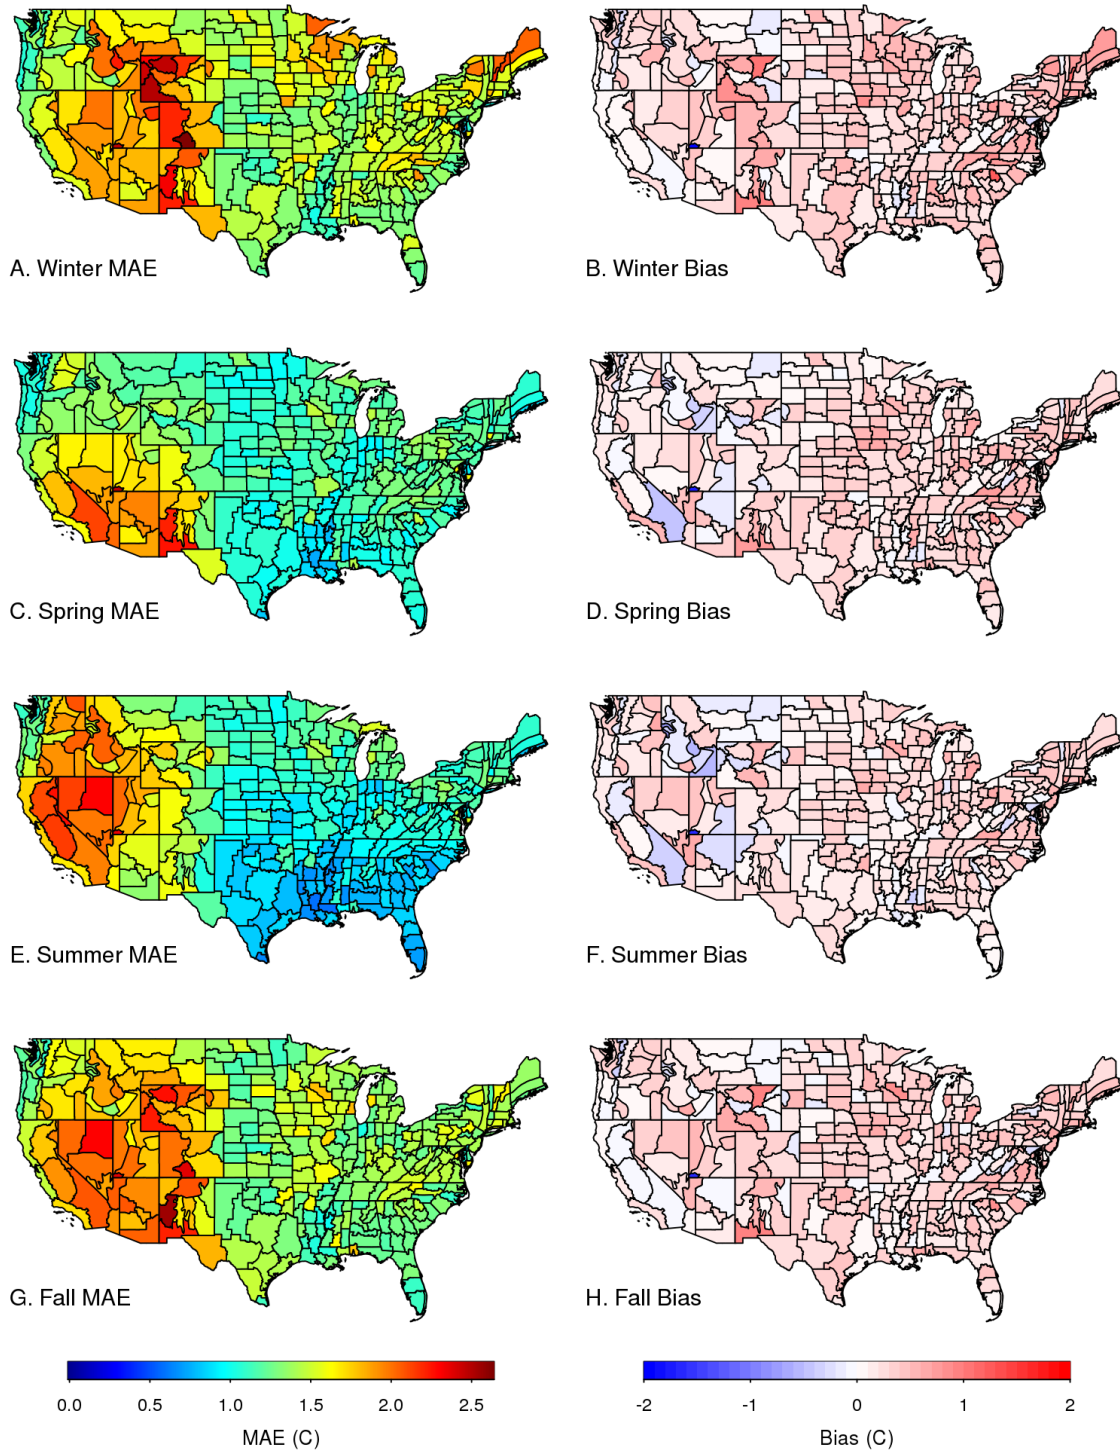

**Fig. S4.** Seasonal errors in daily minimum temperature averaged by US climate division, with Mean Absolute Error (MAE) in the left panel and bias in the right panel.

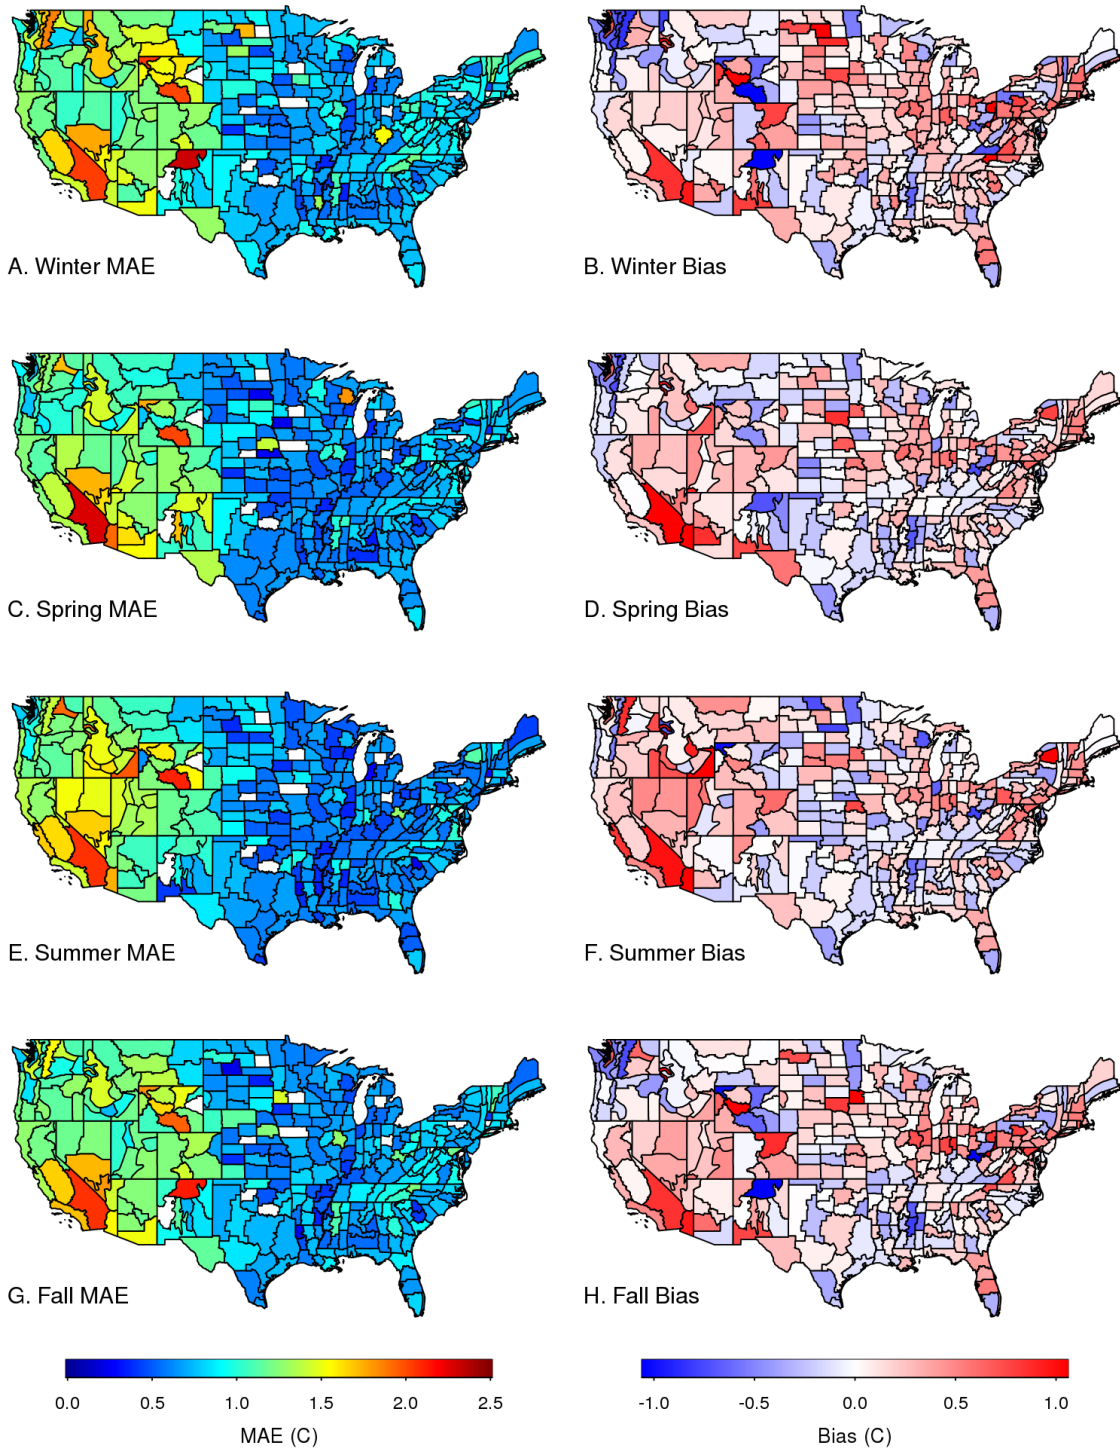

**Fig. S5.** Seasonal errors in mean daily dewpoint temperature averaged by US climate division, with Mean Absolute Error (MAE) in the left panel and bias in the right panel.

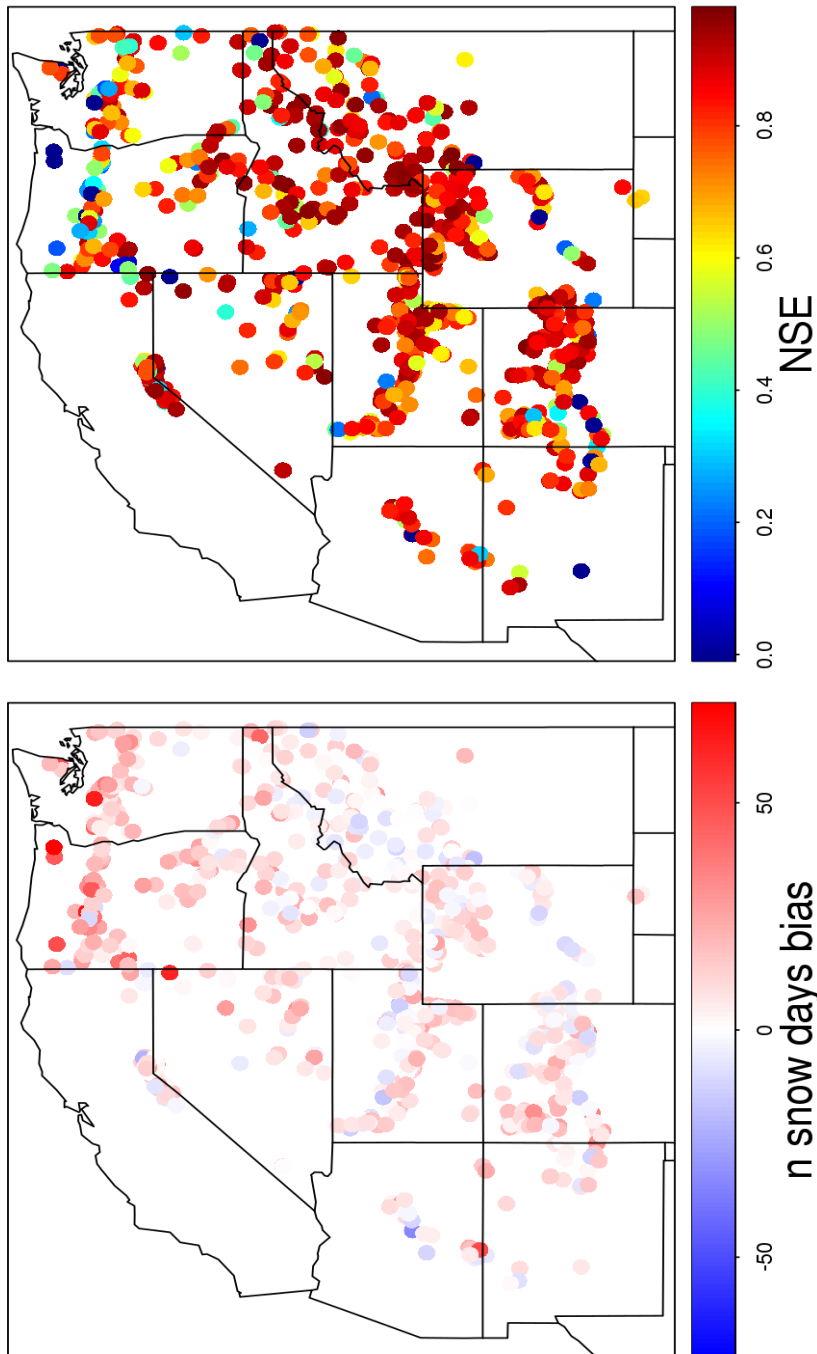

**Fig. S6.** Daily snow model validation at 844 western US SNOTEL stations. The upper panel shows the Nash-Sutcliffe efficiency statistic of the observed versus modeled snow water equivalent from 2000-2015 at each station. The lower panel shows the mean absolute error in the number of snow-free days for the same period.

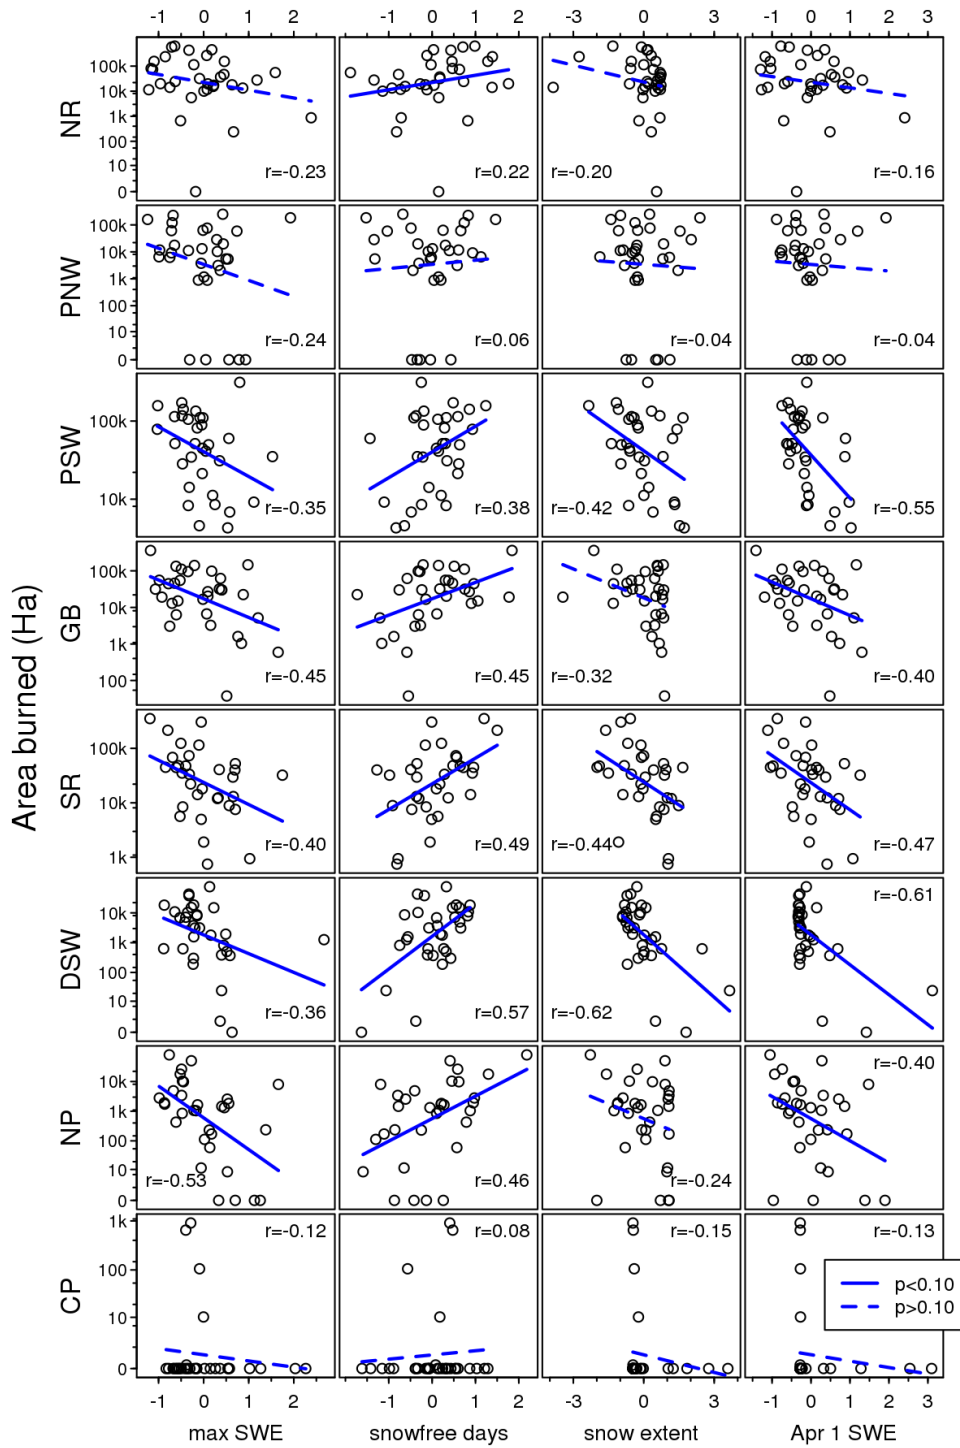

**Fig. S7.** Correlations between metrics of snowpack and snowmelt timing and wildfire area burned calculated for 8 NEON domains. Solid blue fit lines indicate statistical significance at  $p < 0.10$ . A dashed blue line indicate lack of statistical significance.



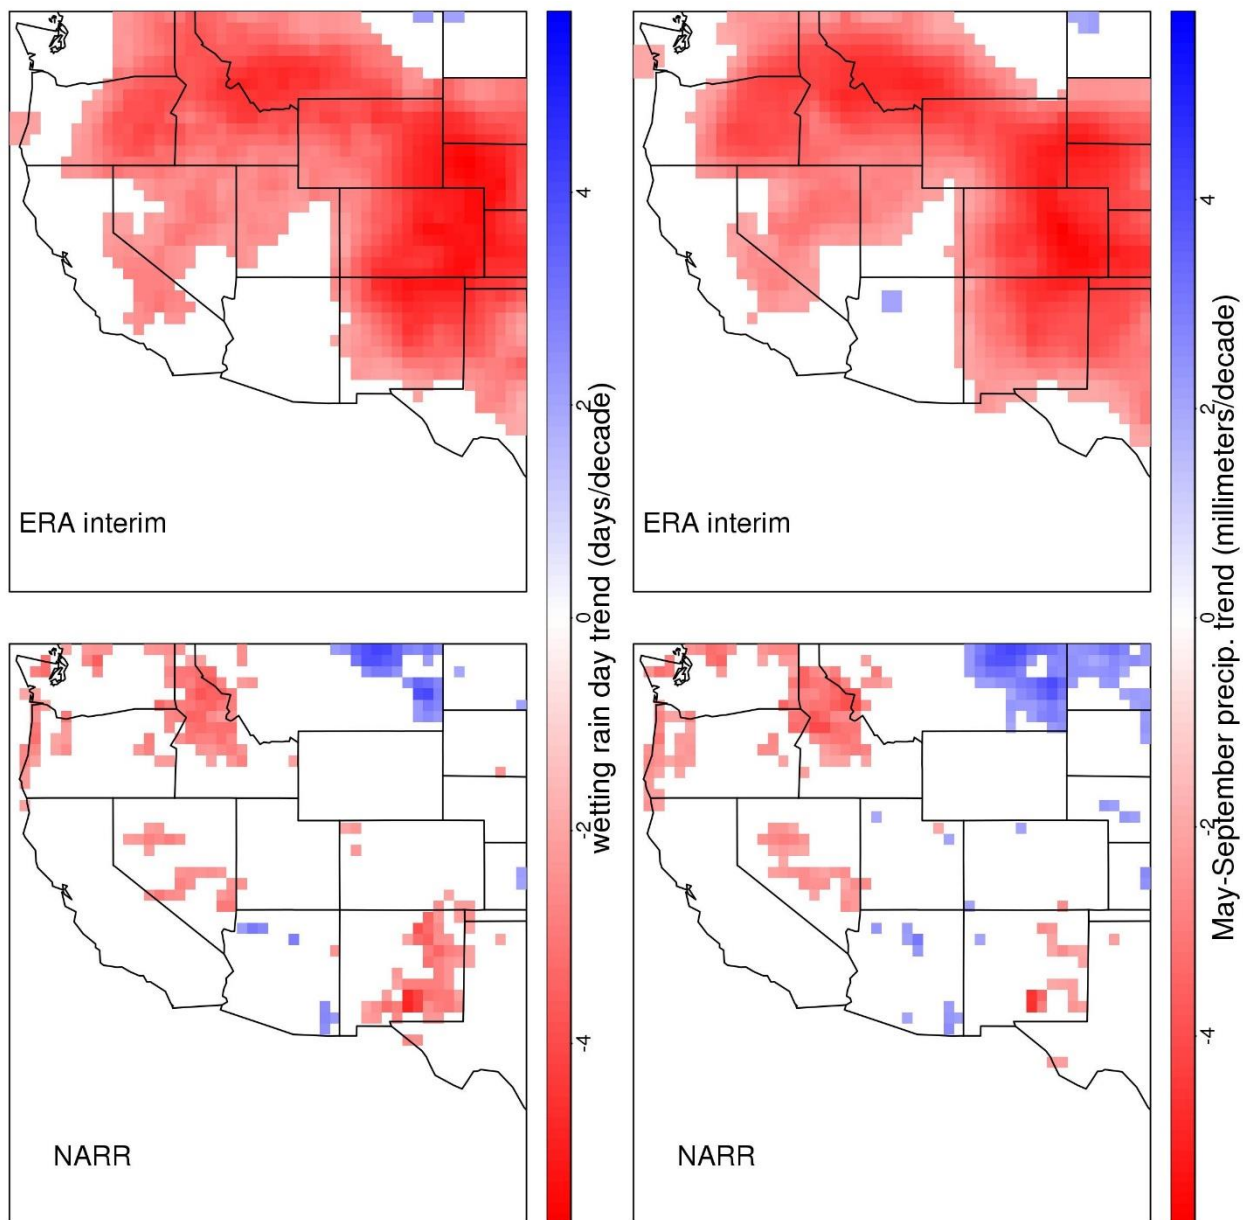

**Fig. S8.** Trends in May-September total precipitation and wetting rain days from 1979-2016 in the ERA-interim reanalysis and North American Regional Reanalysis (NARR) datasets. Trends are calculated using the Mann-Kendall trend test. Only pixels with significant trends at  $p < 0.10$  are shown.

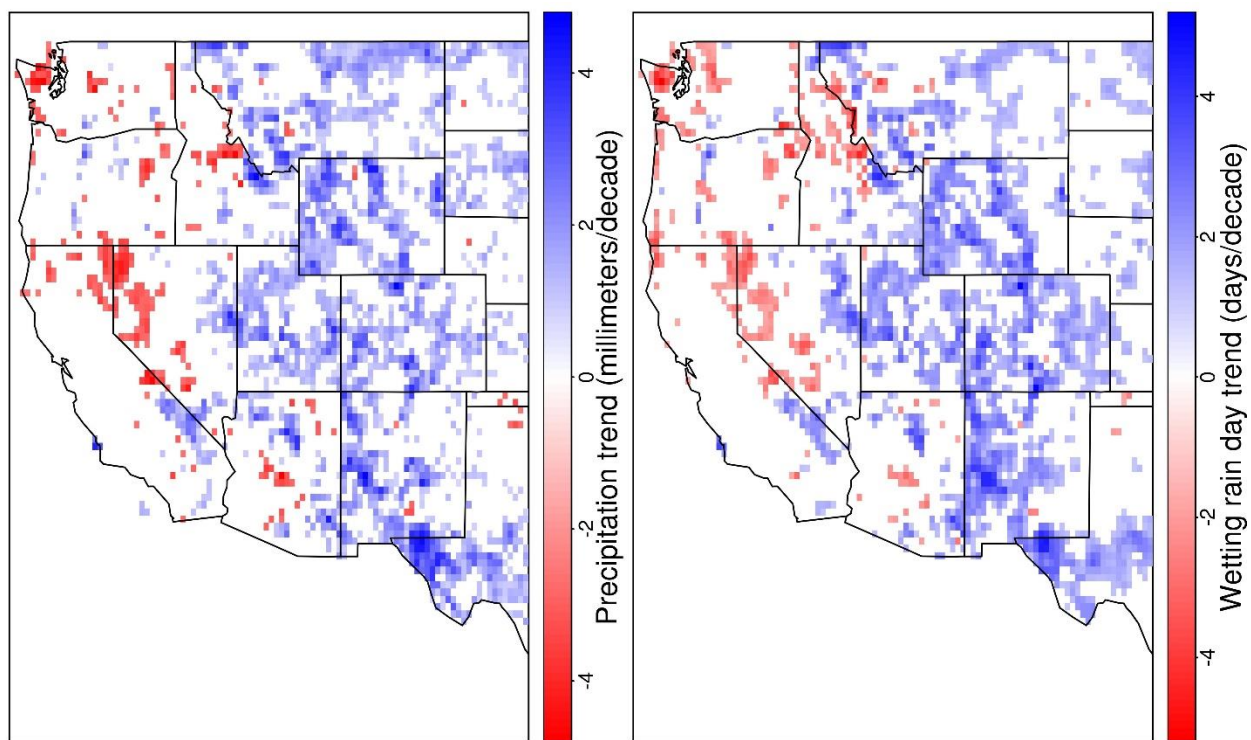

**Fig. S9.** Linear trends in the NOAA Climate Prediction Center unified gauge-based precipitation analysis from 1948-2016. Trends were calculated using the Mann-Kendall trend test. Only grid cells with trends significant at  $p < 0.10$  are shown.

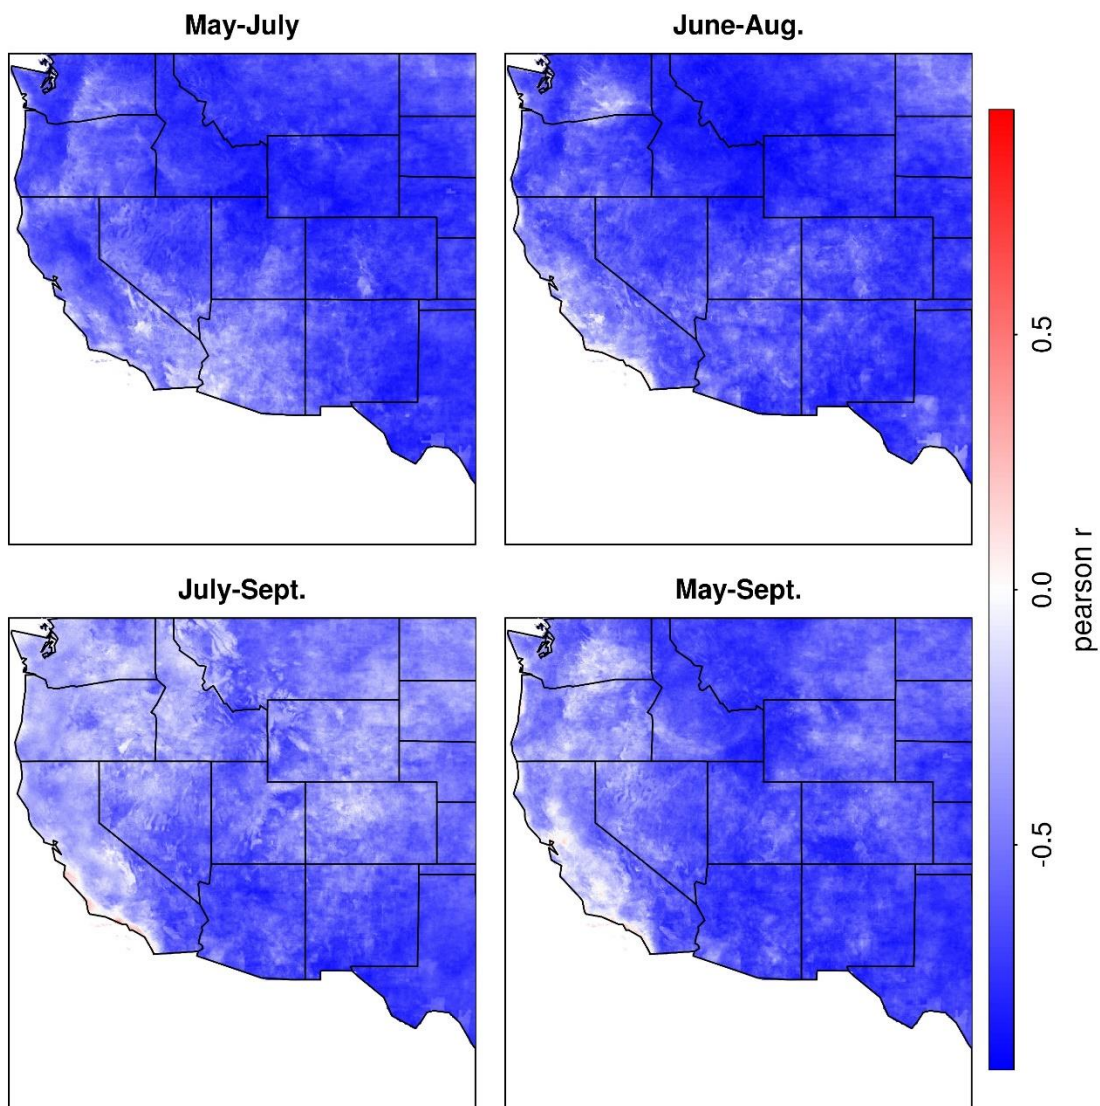

**Fig. S10.** Pixel-wise linear correlations from 1979-2016 between the average maximum vapor pressure deficit and GRIDMET wetting rain days for the periods May-July (upper left panel) June-August (upper right panel) July-September (lower left panel) and May-September (lower right panel). 250 meter resolution vapor pressure deficit grids were resampled to 4km resolution prior to calculating correlation values.

**Table S1. Coefficients used to correct for local terrain effects in models of minimum and maximum temperature and mean daily dewpoint temperature.**

|                                       | $T_{\min}$ | $T_{\max}$ | $T_{\text{dew}}$ |
|---------------------------------------|------------|------------|------------------|
| Intercept                             | -2.472     | 1.024      | -0.02369         |
| CFSR free-air tmin                    | 1.0000     | -          | -                |
| CFSR free-air tmax                    | -          | 0.9186     | -                |
| CFSR free-air tdew                    | -          | -          | 0.6045           |
| CAD-P                                 | 0.9814     | -          | -                |
| CFSR 2m RH                            | 0.02688    | -          | -                |
| CRSR standardized geopotential height | -0.2529    | -          | -                |
| SRAD                                  | -          | 0.0005757  | -0.0003794       |
| Modeled soil moisture                 | -          | -0.0006660 | -0.001320        |
| SOIL:SRAD                             | -          | -          | 0.000001064      |
| CAD-P:std. Geo. Height                | 0.2035     | -          | -                |
| CAD-P:CFSR RH                         | -0.006694  | -          | -                |
| modeled Tmin                          | -          | -          | 0.4462           |
